# Supplementary material for: Genetic variations of NTCP are associated with susceptibility to HBV infection and related hepatocellular carcinoma
Source: PubMed Central journal article supplement (PMC5739647; doi:10.18632/oncotarget.22211), 2017-10-31
Supplement: oncotarget-08-105407-s001.pdf [file oncotarget-08-105407-s001.pdf]

# Genetic variations of NTCP are associated with susceptibility to HBV infection and related hepatocellular carcinoma

## SUPPLEMENTARY MATERIALS

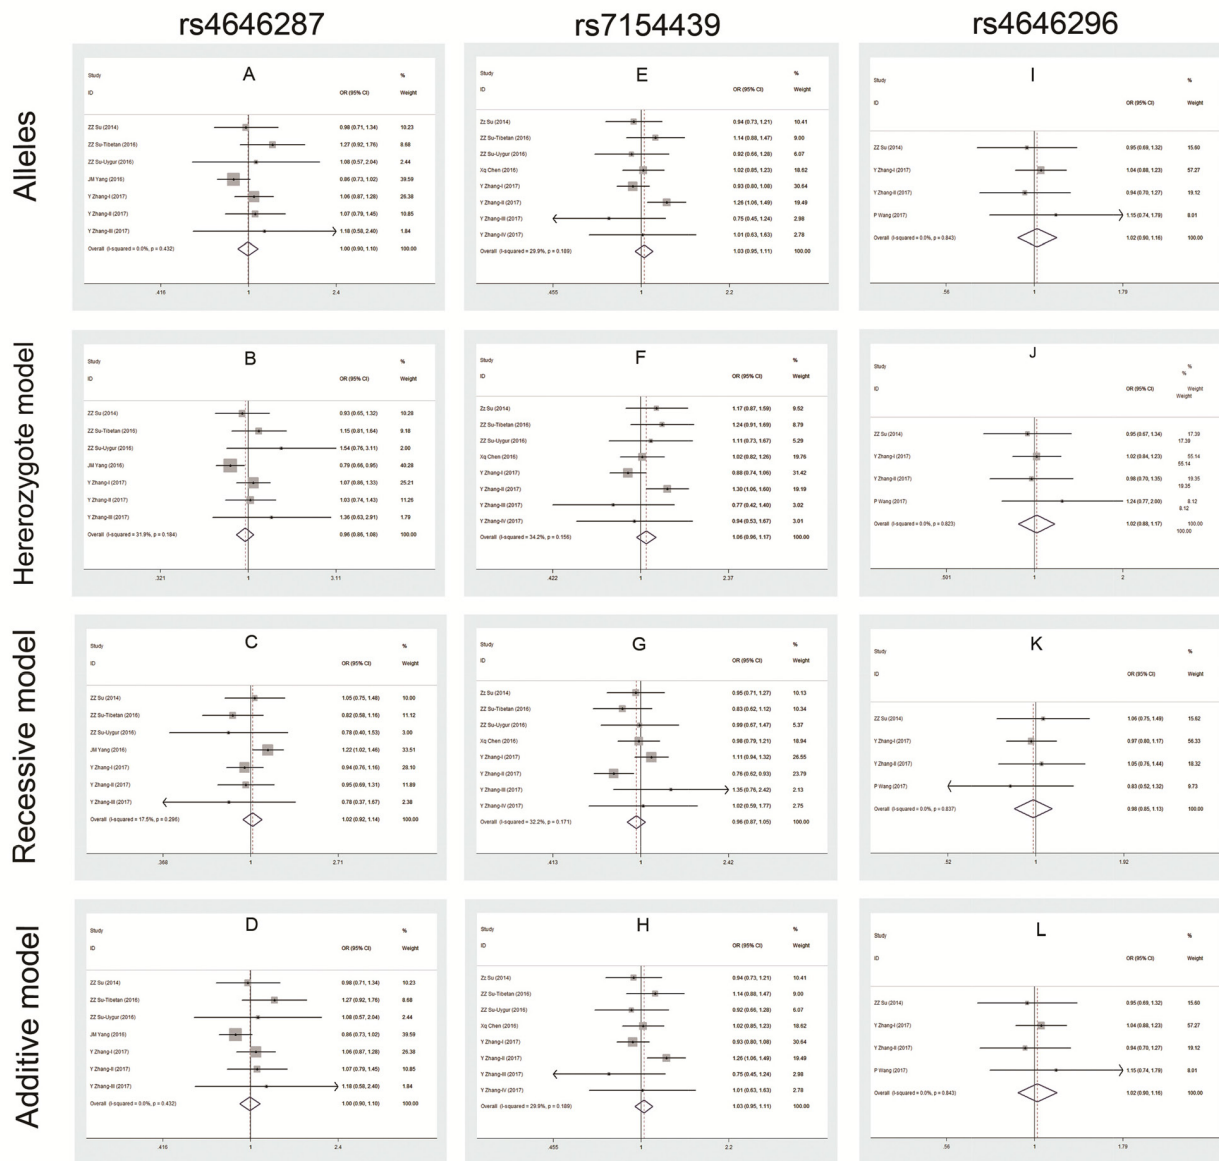

Supplementary Figure 1: Forest plots show odds ratio (OR) for the associations between NTCP variations (rs4646287, rs7154439 and rs4646296) and HBV infection. (A, E, I) allele model (G vs A); (B, F, J) heterozygote model (GA vs GG); (C, G, K) recessive model (AA+GA vs GG); (D, H, L) additive model.

Author(s): Peng Wang, Ruidong Mo.  
 Date: 2017-05-12  
 Question: Should gene mutations in NTCP be used for HBV infection?  
 Settings: inpatient, outpatient, in China  
 Bibliography:

| No of studies                                                                             | Design                             | Quality assessment      |                           |                         |                        |                                                                            | Other considerations       | No of patients |                           | Effect   |                                              | Quality       | Importance |
|-------------------------------------------------------------------------------------------|------------------------------------|-------------------------|---------------------------|-------------------------|------------------------|----------------------------------------------------------------------------|----------------------------|----------------|---------------------------|----------|----------------------------------------------|---------------|------------|
|                                                                                           |                                    | Risk of bias            | Inconsistency             | Indirectness            | Imprecision            | Gene mutations in NTCP                                                     |                            | Control        | Relative (95% CI)         | Absolute |                                              |               |            |
| <b>rs2296651 association (timing of exposure 3 years; assessed with: genotype)</b>        |                                    |                         |                           |                         |                        |                                                                            |                            |                |                           |          |                                              |               |            |
| 8                                                                                         | observational studies <sup>1</sup> | no serious risk of bias | very serious <sup>1</sup> | no serious indirectness | no serious imprecision | very strong association reduced effect for RR >> 1 or RR << 1 <sup>1</sup> | 12303 cases 10593 controls |                | OR 0.590 (0.370 to 0.941) | -        | 57 fewer per 1000 (from 8 fewer to 90 fewer) | ⊕⊕⊕○ MODERATE | CRITICAL   |
|                                                                                           |                                    |                         |                           |                         |                        |                                                                            |                            | 15.26%         |                           |          |                                              |               |            |
| <b>rs4646287 association (timing of exposure 3 years; assessed with: genotype)</b>        |                                    |                         |                           |                         |                        |                                                                            |                            |                |                           |          |                                              |               |            |
| 4                                                                                         | observational studies <sup>1</sup> | no serious risk of bias | no serious inconsistency  | no serious indirectness | no serious imprecision | increased effect for RR ~1 <sup>1</sup>                                    | 5488 cases 3996 controls   |                | OR 1.023 (0.917 to 1.142) | -        | 0 more per 1000 (from 1 fewer to 1 more)     | ⊕⊕⊕○ MODERATE | IMPORTANT  |
|                                                                                           |                                    |                         |                           |                         |                        |                                                                            |                            | 0.7%           |                           |          |                                              |               |            |
| <b>rs7154439 association (timing of exposure 3 years; assessed with: genotype)</b>        |                                    |                         |                           |                         |                        |                                                                            |                            |                |                           |          |                                              |               |            |
| 4                                                                                         | observational studies <sup>1</sup> | no serious risk of bias | no serious inconsistency  | no serious indirectness | no serious imprecision | increased effect for RR ~1 <sup>1</sup>                                    | 4465 cases 4157 controls   |                | OR 0.955 (0.871 to 1.047) | -        | 9 fewer per 1000 (from 26 fewer to 9 more)   | ⊕⊕⊕○ MODERATE | IMPORTANT  |
|                                                                                           |                                    |                         |                           |                         |                        |                                                                            |                            | 25.82%         |                           |          |                                              |               |            |
| <b>rs4646296 association (Copy) (timing of exposure 3 years; assessed with: genotype)</b> |                                    |                         |                           |                         |                        |                                                                            |                            |                |                           |          |                                              |               |            |
| 3                                                                                         | observational studies <sup>1</sup> | no serious risk of bias | no serious inconsistency  | no serious indirectness | no serious imprecision | increased effect for RR ~1 <sup>1</sup>                                    | 2479 cases 2399 controls   |                | OR 0.982 (0.854 to 1.129) | -        | 3 fewer per 1000 (from 29 fewer to 24 more)  | ⊕⊕⊕○ MODERATE | IMPORTANT  |
|                                                                                           |                                    |                         |                           |                         |                        |                                                                            |                            | 25.82%         |                           |          |                                              |               |            |

<sup>1</sup> case-control

Supplementary Figure 2: Grading of Recommendations Assessment Development and Evaluation (GRADE) the meta-analysis results of gene mutations in NTCP association with HBV infection.

Supplementary Table 1: PCR primers sequence for NTCP genotyping

| Rs ID      | SNP Property | Base Pair Change | PCR Primers                                                                     |
|------------|--------------|------------------|---------------------------------------------------------------------------------|
| rs17556915 | intron       | G>A              | F: GGTCAGTTCAGCAGTAGCAG<br>R: GATCCCACCATTTCATTGAC<br>S: CACCATTTCATTGACTCAACA  |
| rs2296651  | missense     | G>A              | F: TGA CTTCAGGTGGAAAGGC<br>R: GGAGACTGGATGCCAAAATG<br>S: CCAA AATGTCCA ACTCTGTT |
| rs4646296  | intron       | G>C              | F: GCCTACACCACGGACAAGAA<br>R: AGGCAGGAAAGATCTTCGAG<br>S: TCCTCCAACCCCAATTGAT    |
| rs9323529  | intron       | T>G              | F: GTCTTGAGAGCTAAAGATCC<br>R: TCTAGACCAACCAAATTCCC<br>S: AGTATTGTCCTTTGAGGTCAC  |
| rs943276   | intron       | G>A              | F: TACAGCTGGCCCTTTGACAT<br>R: GTGAAATCAGCAACTCATTC<br>S: CATTCCATTTTTTAAATGTG   |
| rs943277   | intron       | G>A              | F: CCTGGCTGTTTCTTATAATCG<br>R: TTCATGTGCTGCCAGACTTC<br>S: AATCCCATTC AATTTGGGA  |

Supplementary Table 2: The call rate, Hardy-Weinberg Equilibrium test and frequencies for the 6 SNPs in the study

| Rs ID      | Chr | Position | MA | Group             | Call rate (%) |          |         | HWE*     |          | Freq(A1) |          |
|------------|-----|----------|----|-------------------|---------------|----------|---------|----------|----------|----------|----------|
|            |     |          |    |                   | Controls      | Patients | overall | Controls | Patients | Controls | Patients |
| rs17556915 | 14  | 70248357 | A  | Discovery group   | 100           | 99.6     | 99.8    | 1        | 1        | 0.003    | 0.01     |
| rs4646296  | 14  | 70243504 | C  | Discovery group   | 99.6          | 99.6     | 99.6    | 0.676    | 0.704    | 0.08     | 0.092    |
| rs9323529  | 14  | 70243812 | G  | Discovery group   | 99.6          | 100      | 99.8    | 1        | 1        | 0.008    | 0.004    |
| rs943276   | 14  | 70260929 | A  | Discovery group   | 99.2          | 99.6     | 99.4    | 1        | 1        | 0.008    | 0.002    |
| rs2296651  | 14  | 70245192 | A  | Discovery group   | 96.5          | 100      | 98.2    | 1        | 0.143    | 0.097    | 0.02     |
| rs943277   | 14  | 70261324 | A  | Discovery group   | 99.2          | 99.6     | 99.4    | 1        | 0.195    | 0.008    | 0.017    |
| rs2296651  | 14  | 70245192 | A  | Replication group | 100           | 99.7     | 99.9    | 0.09     | <0.001   | 0.109    | 0.024    |
| rs943277   | 14  | 70261324 | A  | Replication group | 99.6          | 99.9     | 99.8    | 1        | 1        | 0.002    | 0.003    |

Chr: Chromosome; MA: Minor Allele; \* Hardy-Weinberg Equilibrium test; Freq: Frequency of A1.

Supplementary Table 3: Quality assessment for included studies using the Newcastle-Ottawa Scale

| Study           | Year | Selection |   |   |   | Comparability |   | Exposure |   |   | Score |
|-----------------|------|-----------|---|---|---|---------------|---|----------|---|---|-------|
|                 |      | 1         | 2 | 3 | 4 | 1             | 2 | 1        | 2 | 3 |       |
| Zhenzhen Su     | 2014 | ☆         | ☆ | ☆ | ☆ | ☆             | / | ☆        | ☆ | / | 7     |
| Liang Peng      | 2014 | ☆         | ☆ | ☆ | ☆ | ☆             | / | ☆        | ☆ | / | 7     |
| Na Li           | 2014 | ☆         | ☆ | ☆ | ☆ | ☆             | / | ☆        | ☆ | / | 7     |
| Qiang Li        | 2015 | ☆         | / | ☆ | / | ☆             | / | ☆        | ☆ | / | 5     |
| Hui-Han Hu      | 2015 | ☆         | ☆ | ☆ | ☆ | ☆             | / | ☆        | ☆ | / | 7     |
| Jingmin Yang    | 2016 | ☆         | ☆ | ☆ | ☆ | ☆             | / | ☆        | ☆ | / | 7     |
| Zhenzhen Su     | 2016 | ☆         | ☆ | ☆ | ☆ | ☆             | / | ☆        | ☆ | / | 7     |
| Xueqin Chen     | 2016 | ☆         | ☆ | ☆ | ☆ | ☆             | ☆ | ☆        | ☆ | / | 8     |
| Ying Zhang      | 2017 | ☆         | ☆ | ☆ | ☆ | ☆             | / | ☆        | ☆ | / | 7     |
| Sayeh Ezzikouri | 2017 | ☆         | ☆ | ☆ | ☆ | ☆             | / | ☆        | ☆ | / | 7     |
| Peng Wang       | 2017 | ☆         | ☆ | ☆ | ☆ | ☆             | / | ☆        | ☆ | / | 7     |

Criteria for Selection: 1) Adequate definition of the cases; 2) Consecutive or obviously representative series of cases; 3) Representative controls; 4) No history of investigated diseases for control. Criteria for Comparability: 1) Study controls for age and sex; 2) Study controls for additional important factors, for example, smoking, alcohol, etc. Criteria for Exposure: 1) Exposure ascertainment by blinded review or record; 2) Same method ascertaining exposures in both case and control; 3) Same non-response rate in both groups.

**Supplementary Table 4: Characteristics of included studies in meta-analysis of association between rs2296651, rs4646287, rs7154439, rs4646296 polymorphism and HBV infection**

See Supplementary File 1

**Supplementary Table 5: Characteristics of included studies in meta-analysis of association between rs2296651 mutants and HBV-related LC or HCC**

| Rs ID     | Author                 | Year | Ehnicity                  | Method       | P <sub>1</sub> | P <sub>2</sub> | P <sub>3</sub> | Genotype | HC   | CHB  | LC  | HCC |
|-----------|------------------------|------|---------------------------|--------------|----------------|----------------|----------------|----------|------|------|-----|-----|
| rs2296651 | N Li <sup>#</sup>      | 2014 | Northwestern<br>China Han | PCR-<br>RFLP | 0.81           | 0.324          | 0.324          | GG       | 108  | 107  | 56  | 52  |
|           |                        |      |                           |              |                |                |                | GA       | 5    | 13   | 9   | 7   |
|           |                        |      |                           |              |                |                |                | AA       | 0    | 0    | 0   | 0   |
|           | H Hu <sup>#</sup>      | 2015 | Taiwan Area               | TaqMan       | NO             | NO             | NO             | GG       | 3145 | 2274 | 544 | 679 |
|           |                        |      |                           |              |                |                |                | GA       | 651  | 510  | 92  | 101 |
|           |                        |      |                           |              |                |                |                | AA       | 5    | 5    | 0   | 0   |
|           | P<br>Wang <sup>#</sup> | 2017 | Southeastern<br>China Han | SNaPSHOT     | 0.032          | 0.02           | 0.01           | GG       | 956  | 828  | 216 | 112 |
|           |                        |      |                           |              |                |                |                | GA       | 260  | 26   | 20  | 5   |
|           |                        |      |                           |              |                |                |                | AA       | 0    | 1    | 1   | 0   |

<sup>#</sup>: case-control study design and the blood specimens; CHB: chronic hepatitis B; LC: liver cirrhosis; HCC: hepatocellular carcinoma;  $P_{HWE}$ : p value for Hardy-Weinberg equilibrium.  $P_1$ ,  $P_2$  and  $P_3$  were calculated for CHB, LC and HCC group.
